# Supplementary material
Source: Springer Nature journal article supplement (https://www.springermedizin.de/resource/supplementary/12902_2013_190_MOESM3_ESM.pdf/9515726)
Supplement: MOESM3 [file 9515726]

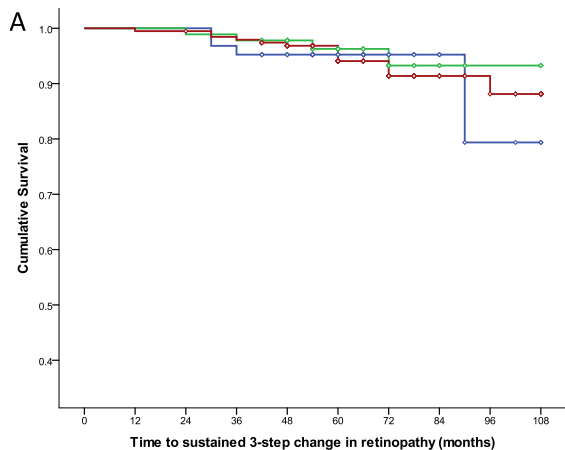

Primary cohort in Intensive treatment

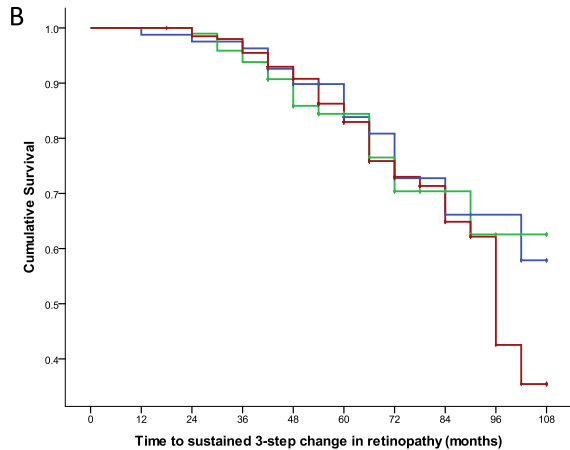

Primary cohort in Standard treatment

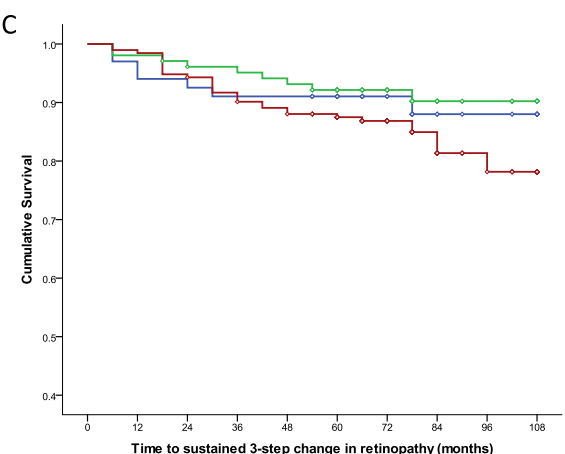

Secondary cohort in Intensive treatment

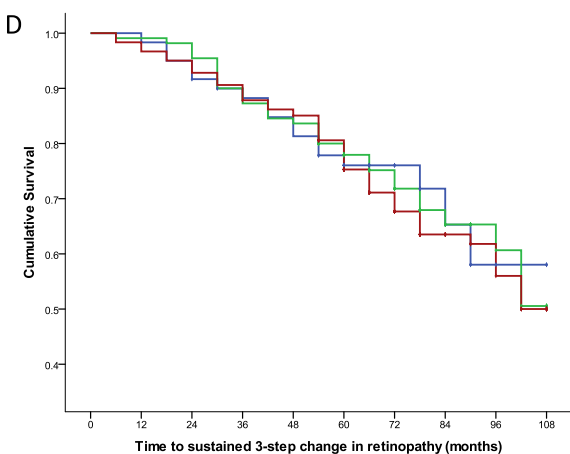

Secondary cohort in Standard treatment

Log-rank test for Intensive arm stratified on primary and secondary prevention cohort  $\chi^2$  3.14 & P value 0.21

Log-rank test for Standard arm stratified on primary and secondary prevention cohort  $\chi^2$  0.93 & P value 0.63

Blue – less than recommended level of leisure time physical activity (Category 1 = METS less than 450)

Green - recommended and up to twice recommended level of leisure time physical activity (Category 2=METS 450-1500)

Red – more than twice recommended level of leisure time physical activity (Category 3 = METS > 1500)

| Level of Physical Activity              | Intensive treatment arm |                  | Standard treatment Arm |                  |
|-----------------------------------------|-------------------------|------------------|------------------------|------------------|
|                                         | HR                      | *Adjusted HR     | HR                     | *Adjusted HR     |
| Less than recommended                   | 1                       | 1                | 1                      | 1                |
| Recommended and up to twice recommended | 0.77 (0.35-1.73)        | 0.93 (0.41-2.09) | 1.08 (0.70-1.67)       | 1.13 (0.73-1.77) |
| More than twice recommended             | 1.29 (0.66-2.49)        | 1.29 (0.64-2.58) | 1.18 (0.80-1.74)       | 1.11 (0.74-1.68) |
